# Supplementary material for: Up-conversion luminescence of Er2Mo4O15 under 980 and 1550 nm excitation
Source: Royal Society of Chemistry journal article supplement (doi:10.1039/c6ra21580g), 2016-01-01
Supplement: c6ra21580g1.pdf [file c6ra21580g1.pdf]

## Up-conversion luminescence of $\text{Er}_2\text{Mo}_4\text{O}_{15}$ under 980 nm and 1550 nm excitation

Tao jiang, Mingming Xing, Ying Tian, Yao Fu, Xiumei Yin, Hong Wang, Xin Feng, Xixian Luo \*

Physics Department, Dalian Maritime University, Dalian, Liaoning, 116026, PR China

### Supporting Information

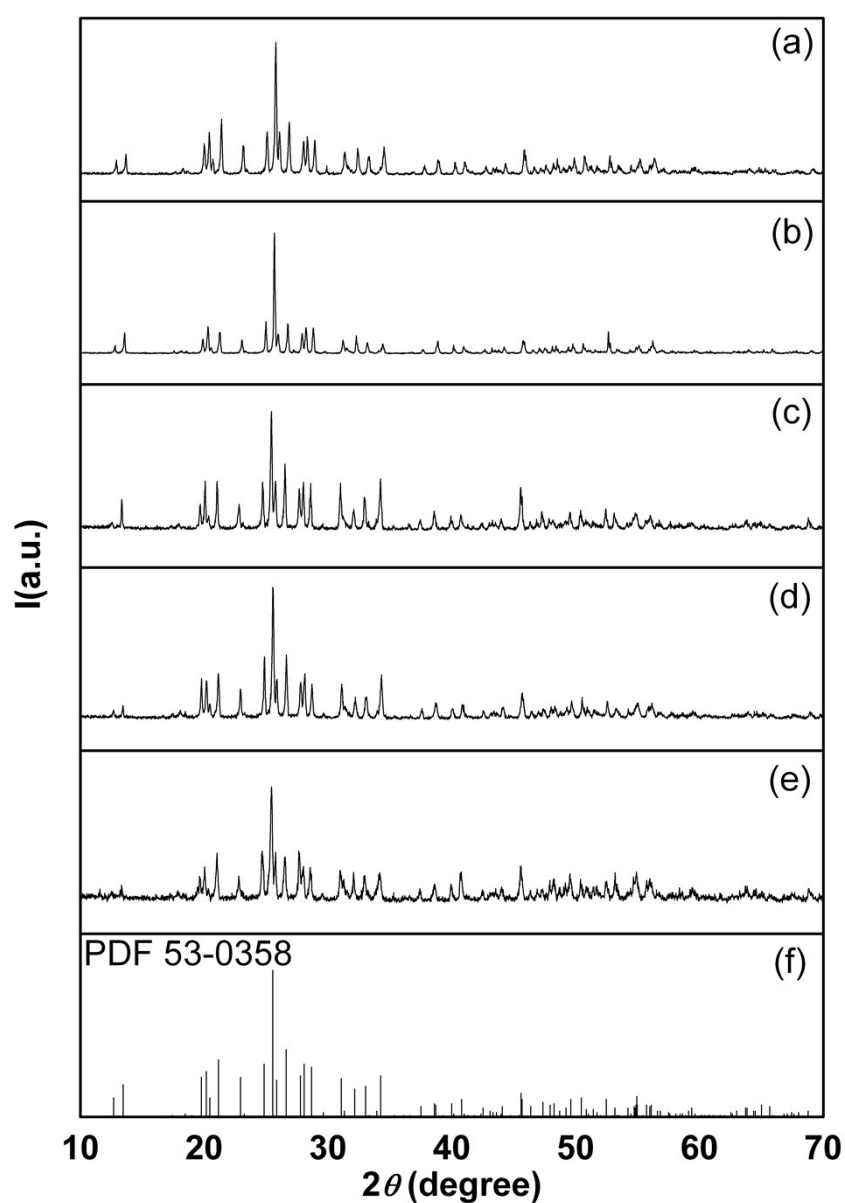

Fig. s1 XRD patterns of the  $\text{Y}_{2-x}\text{Er}_x\text{Mo}_4\text{O}_{15}$  phosphors  
(a)  $x=0.04$  (b)  $x=0.08$  (c)  $x=0.16$  (d)  $x=0.32$  (e)  $x=0.64$  (f) the standard PDF card of  $\text{Y}_2\text{Mo}_4\text{O}_{15}$

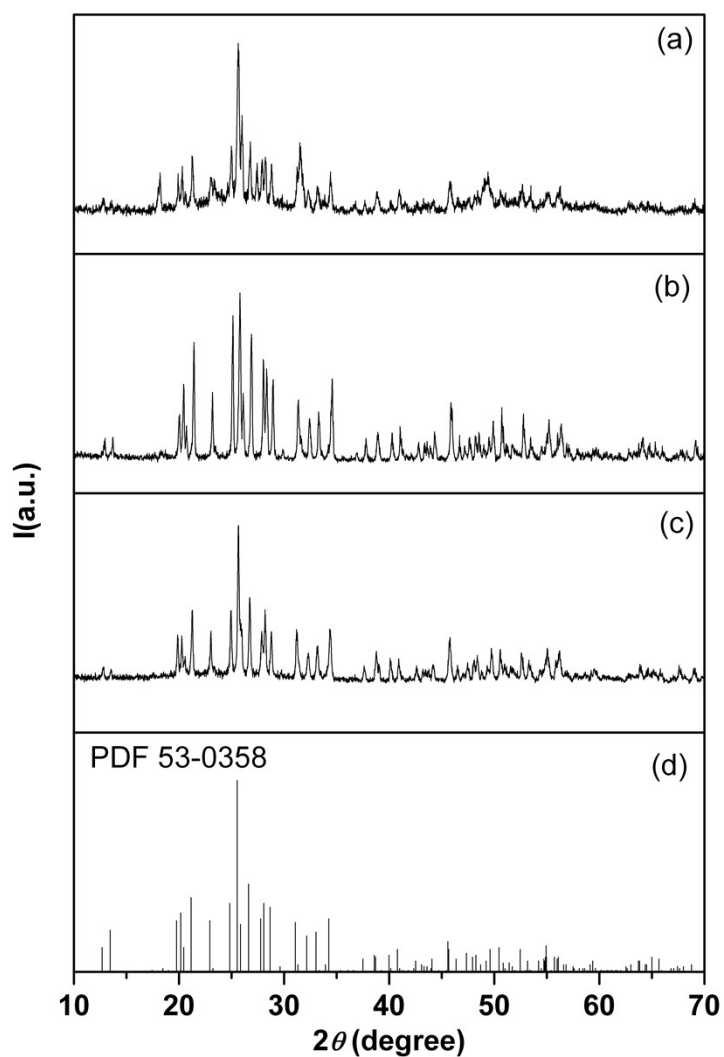

Fig. s2 XRD patterns of the  $Y_2Mo_4O_{15}:Er$  phosphors  
 (a) 900 °C (b) 800 °C (c) 700 °C (d) the standard PDF card of  $Y_2Mo_4O_{15}$

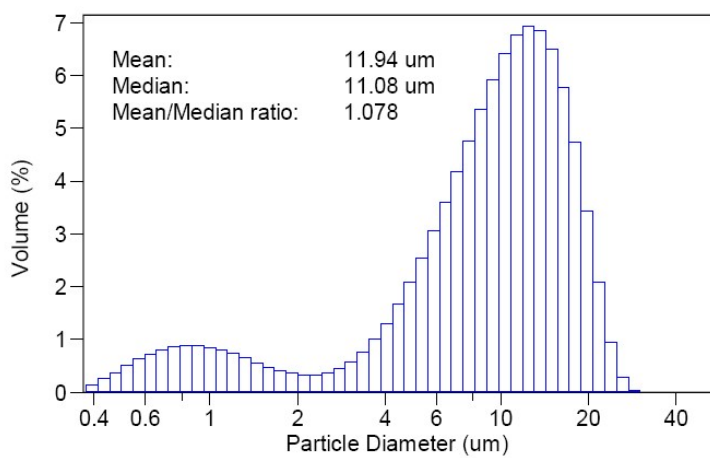

Fig. s3 the particle size diagram of  $Er_2Mo_4O_{15}$
